# Supplementary material for: A Limited Role of p53 on the Ability of a Hexane Fraction of American Ginseng to Suppress Mouse Colitis
Source: Hindawi journal article supplement (doi:10.1155/2012/785739), 2012-01-01

# Supplementary Figure 1

Isolated  
CD4+/CD25- T cells  
Unstained (Control)

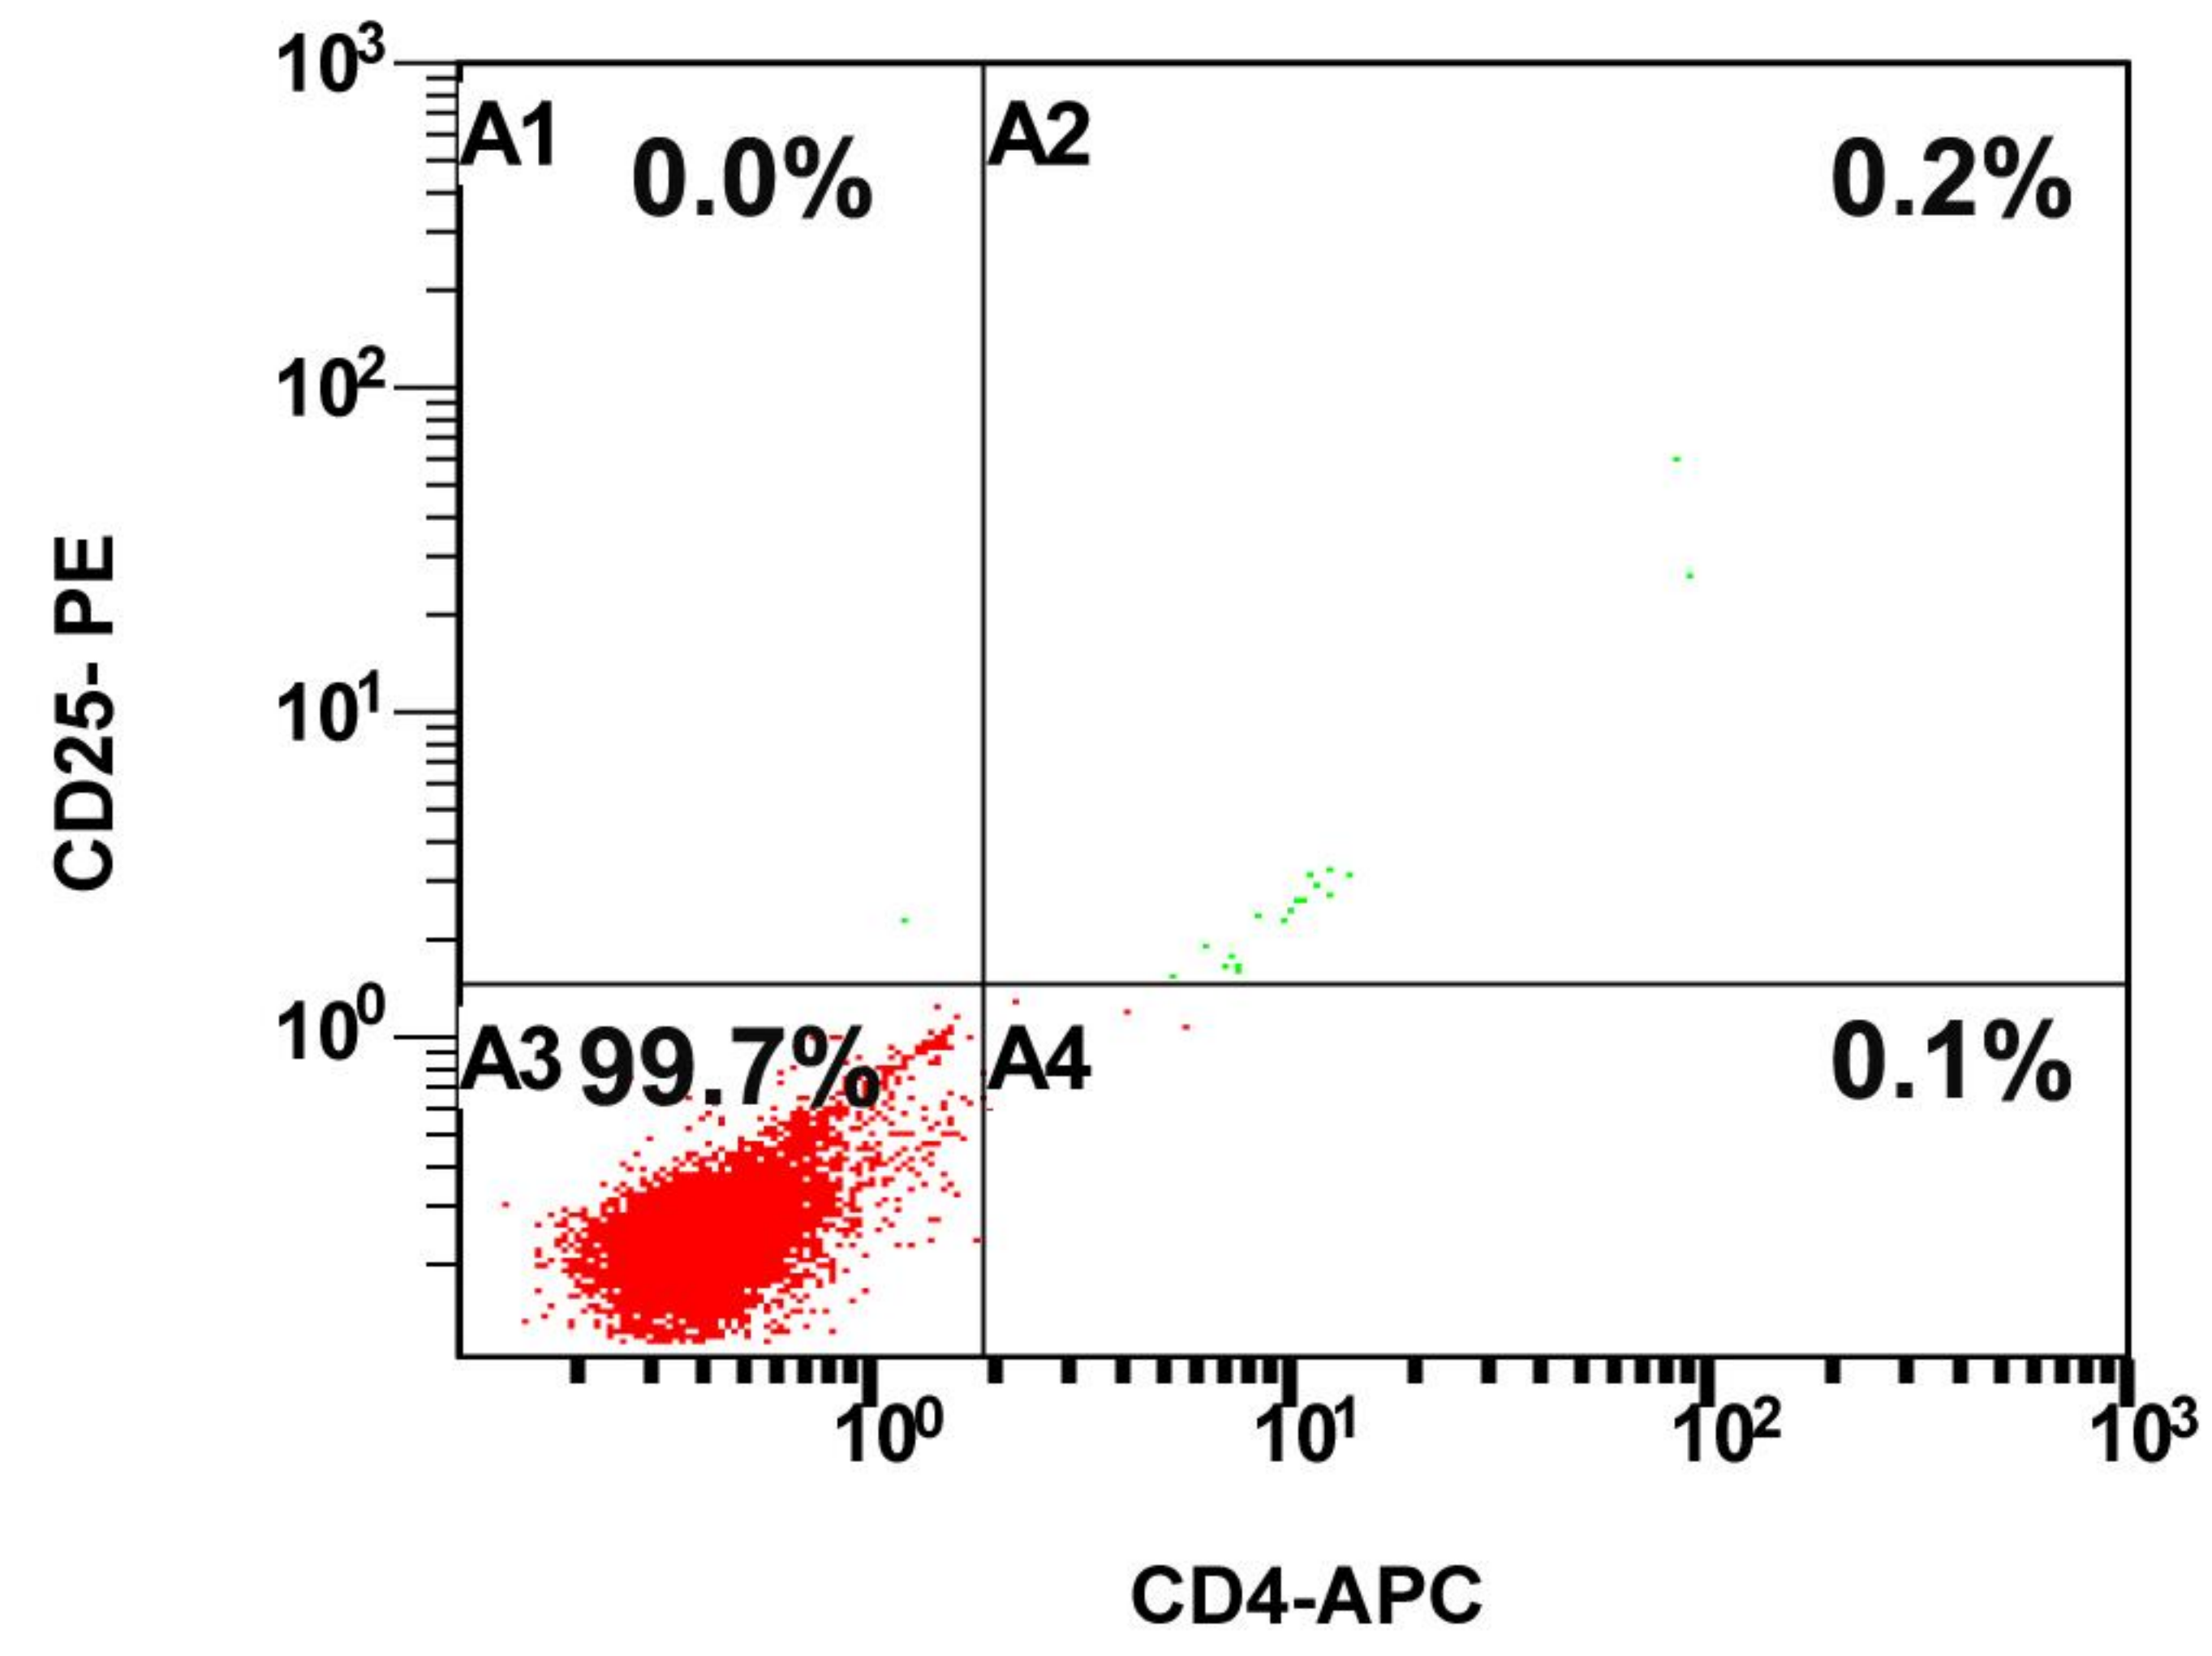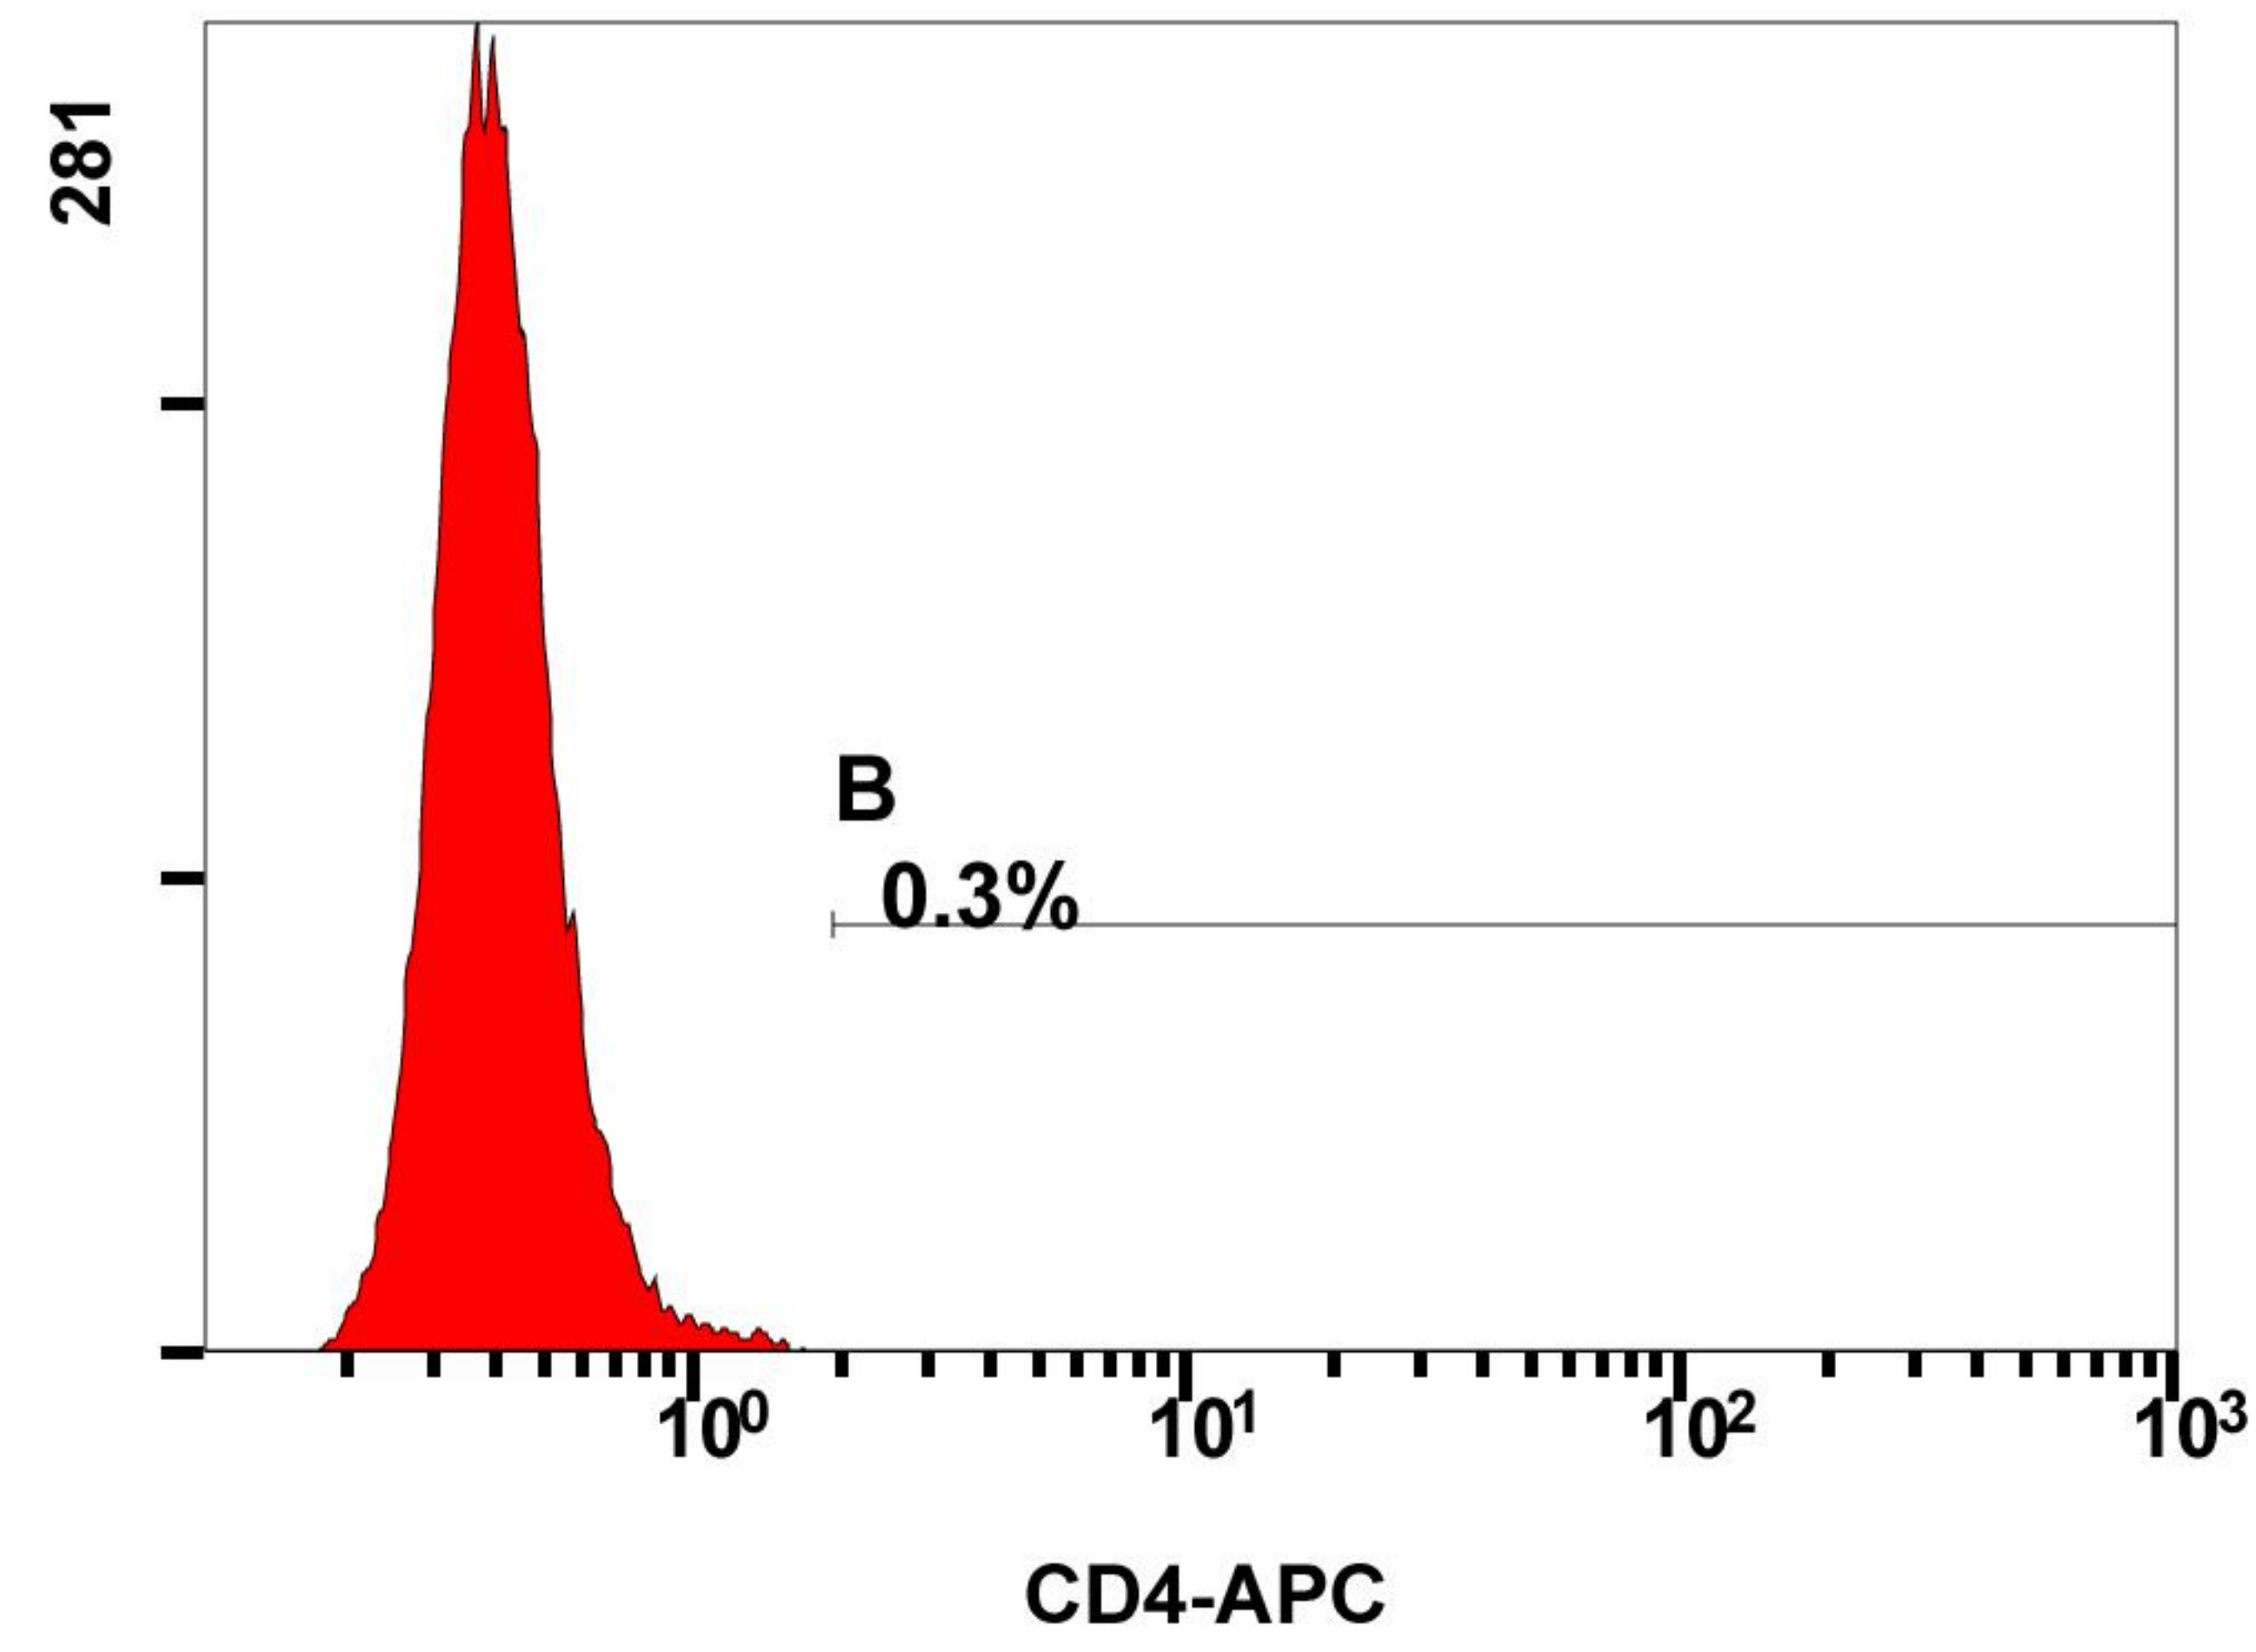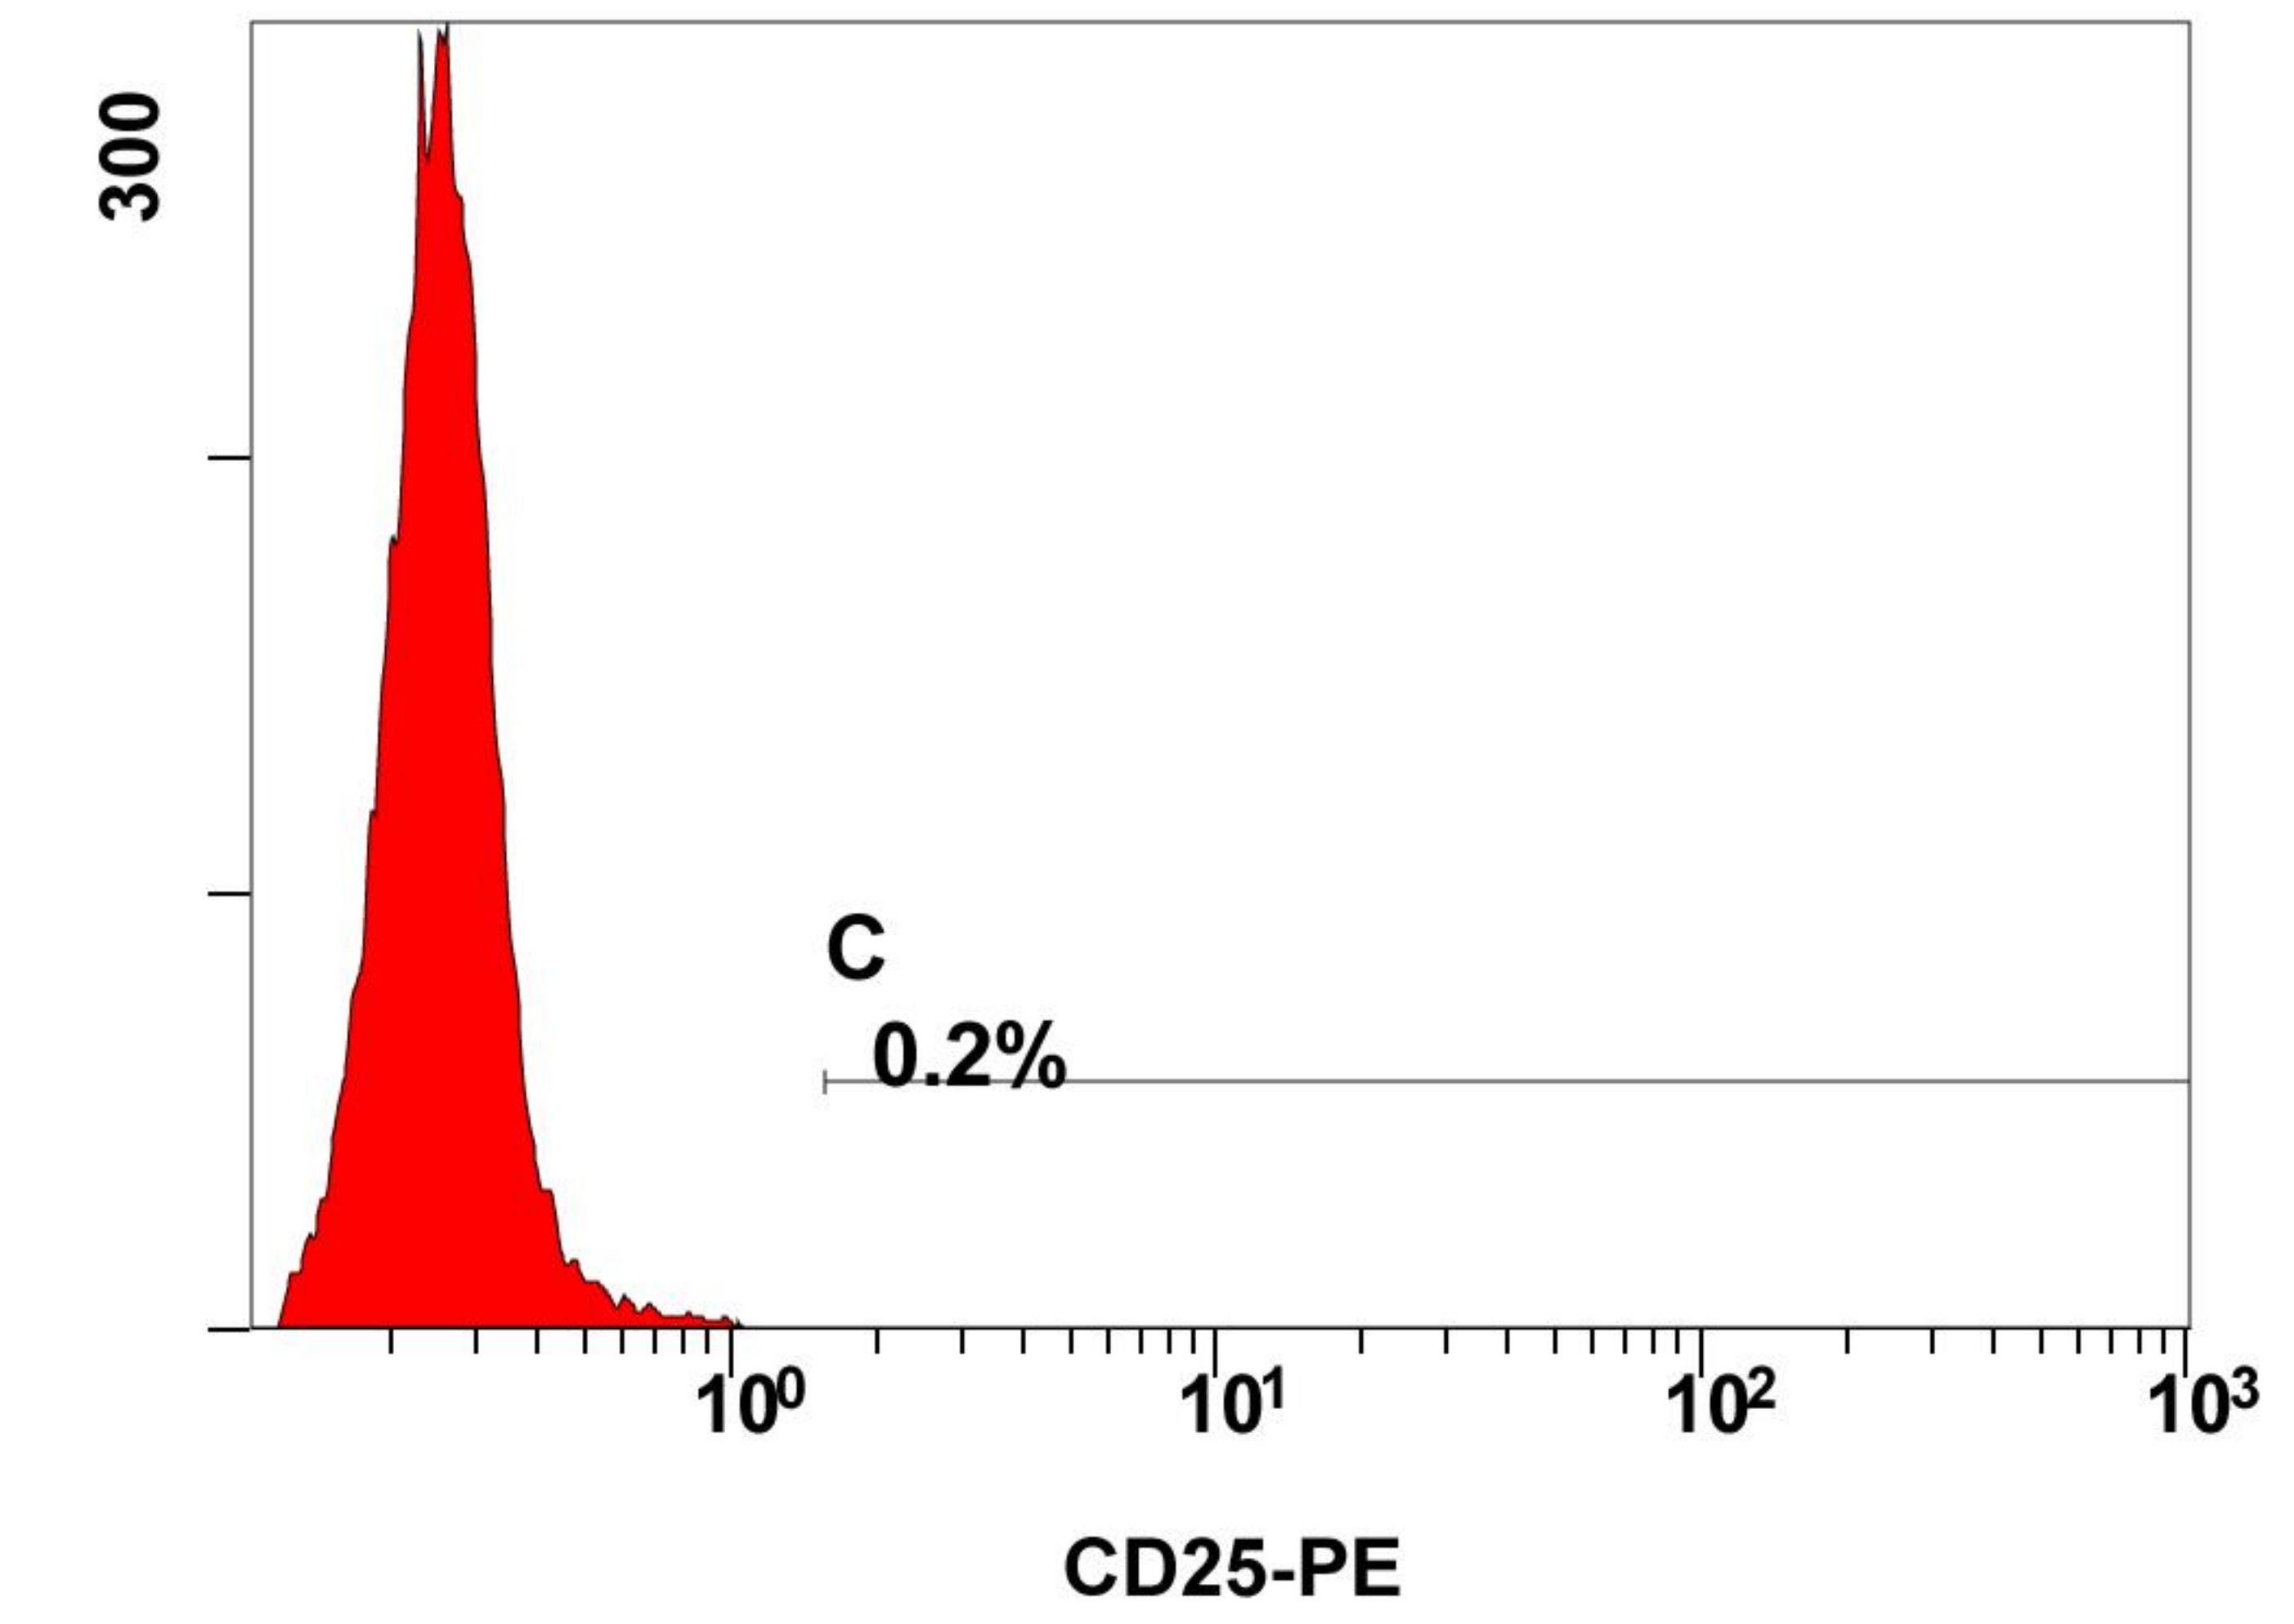

Isolated  
CD4+/CD25- T cells  
dual stained with  
CD4-APC and CD25-PE

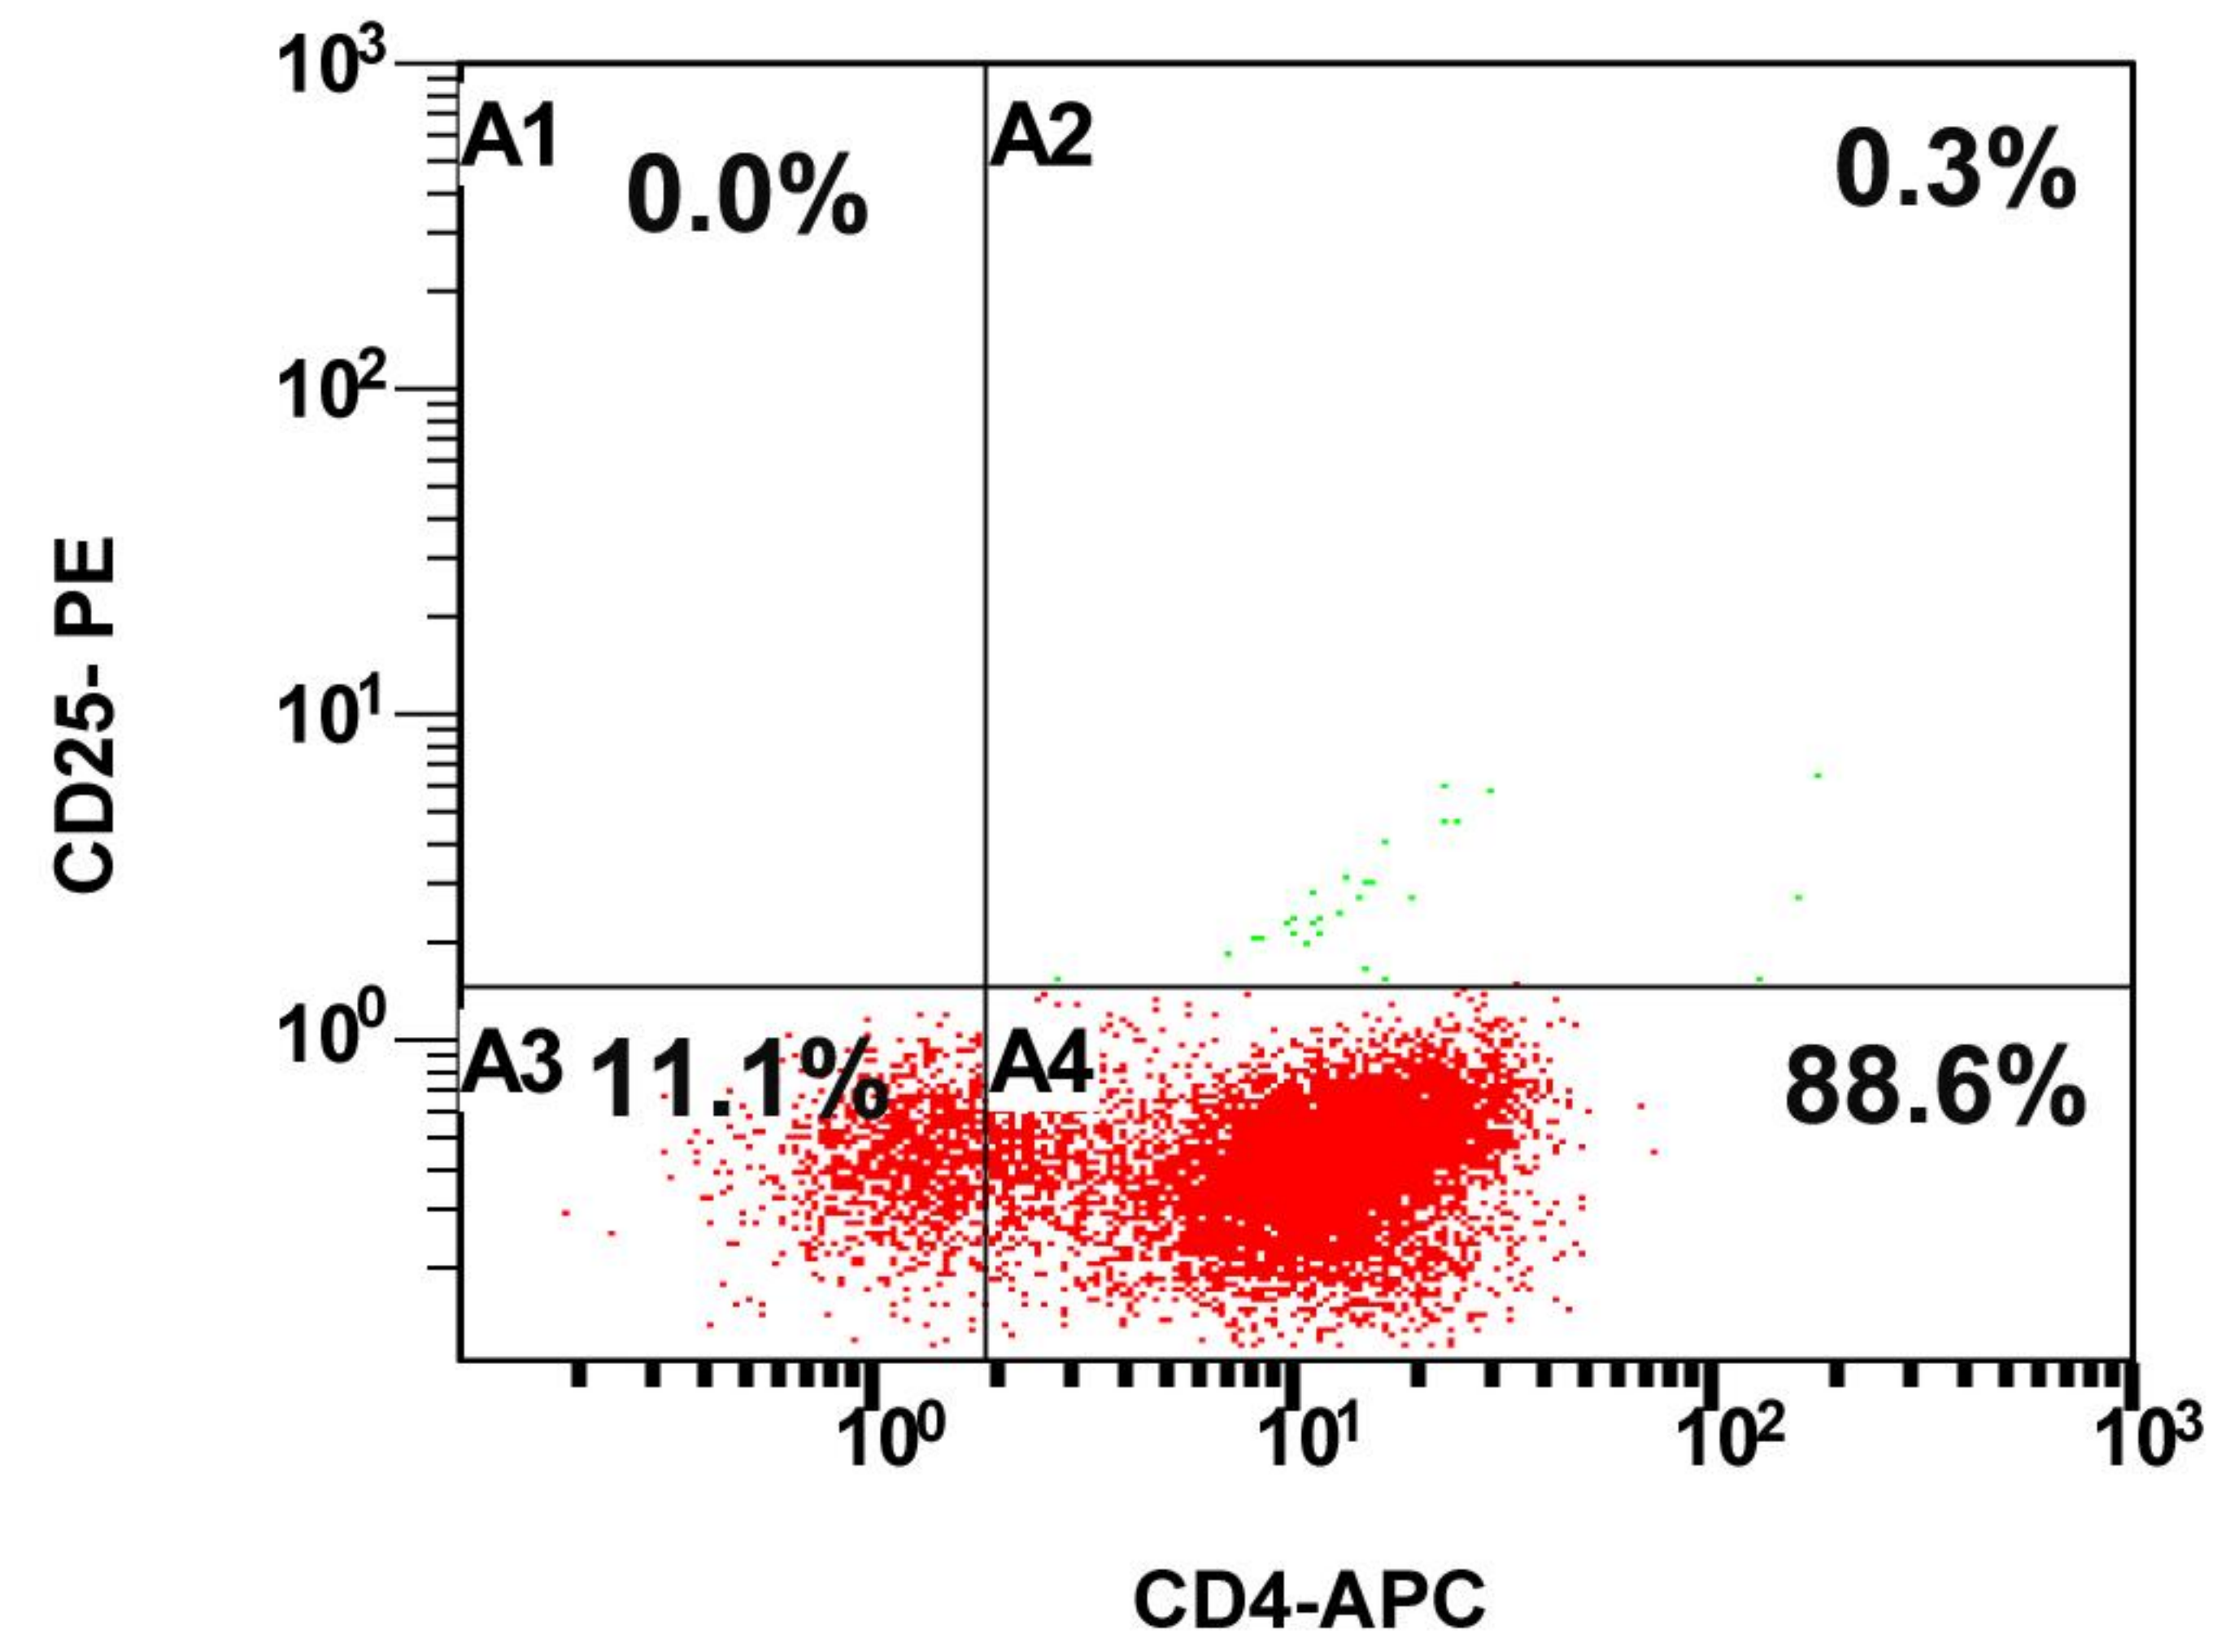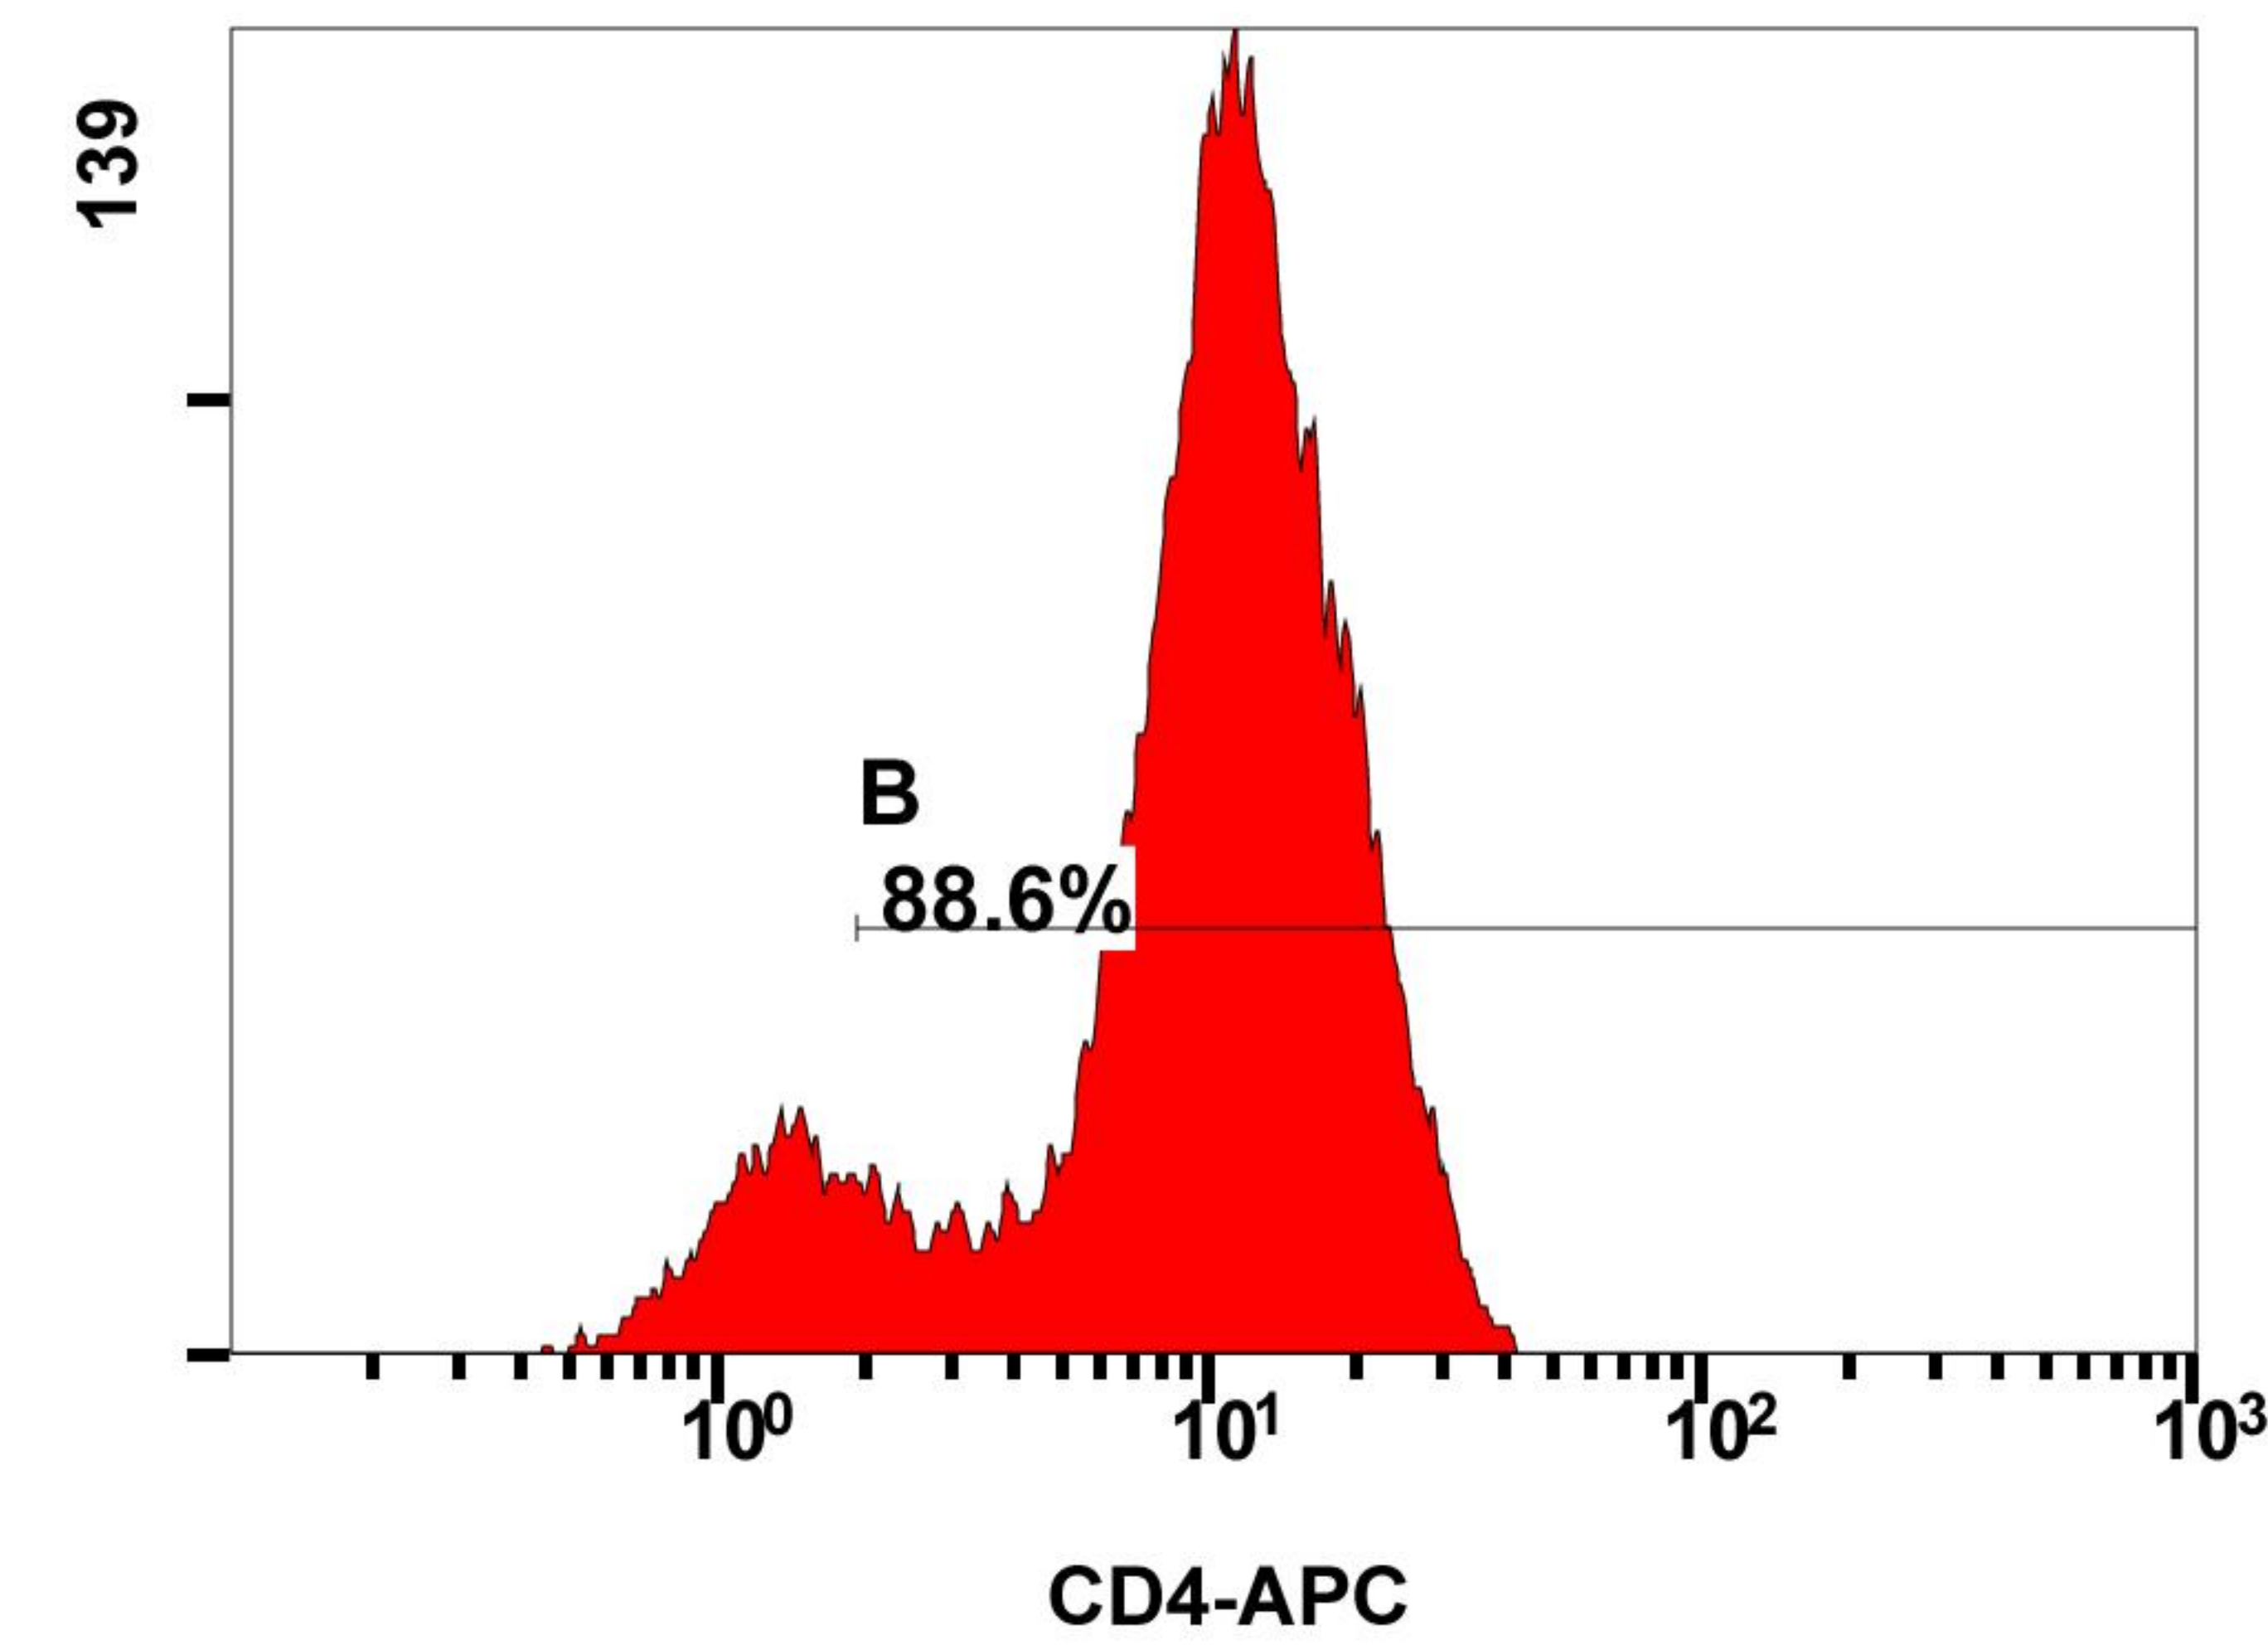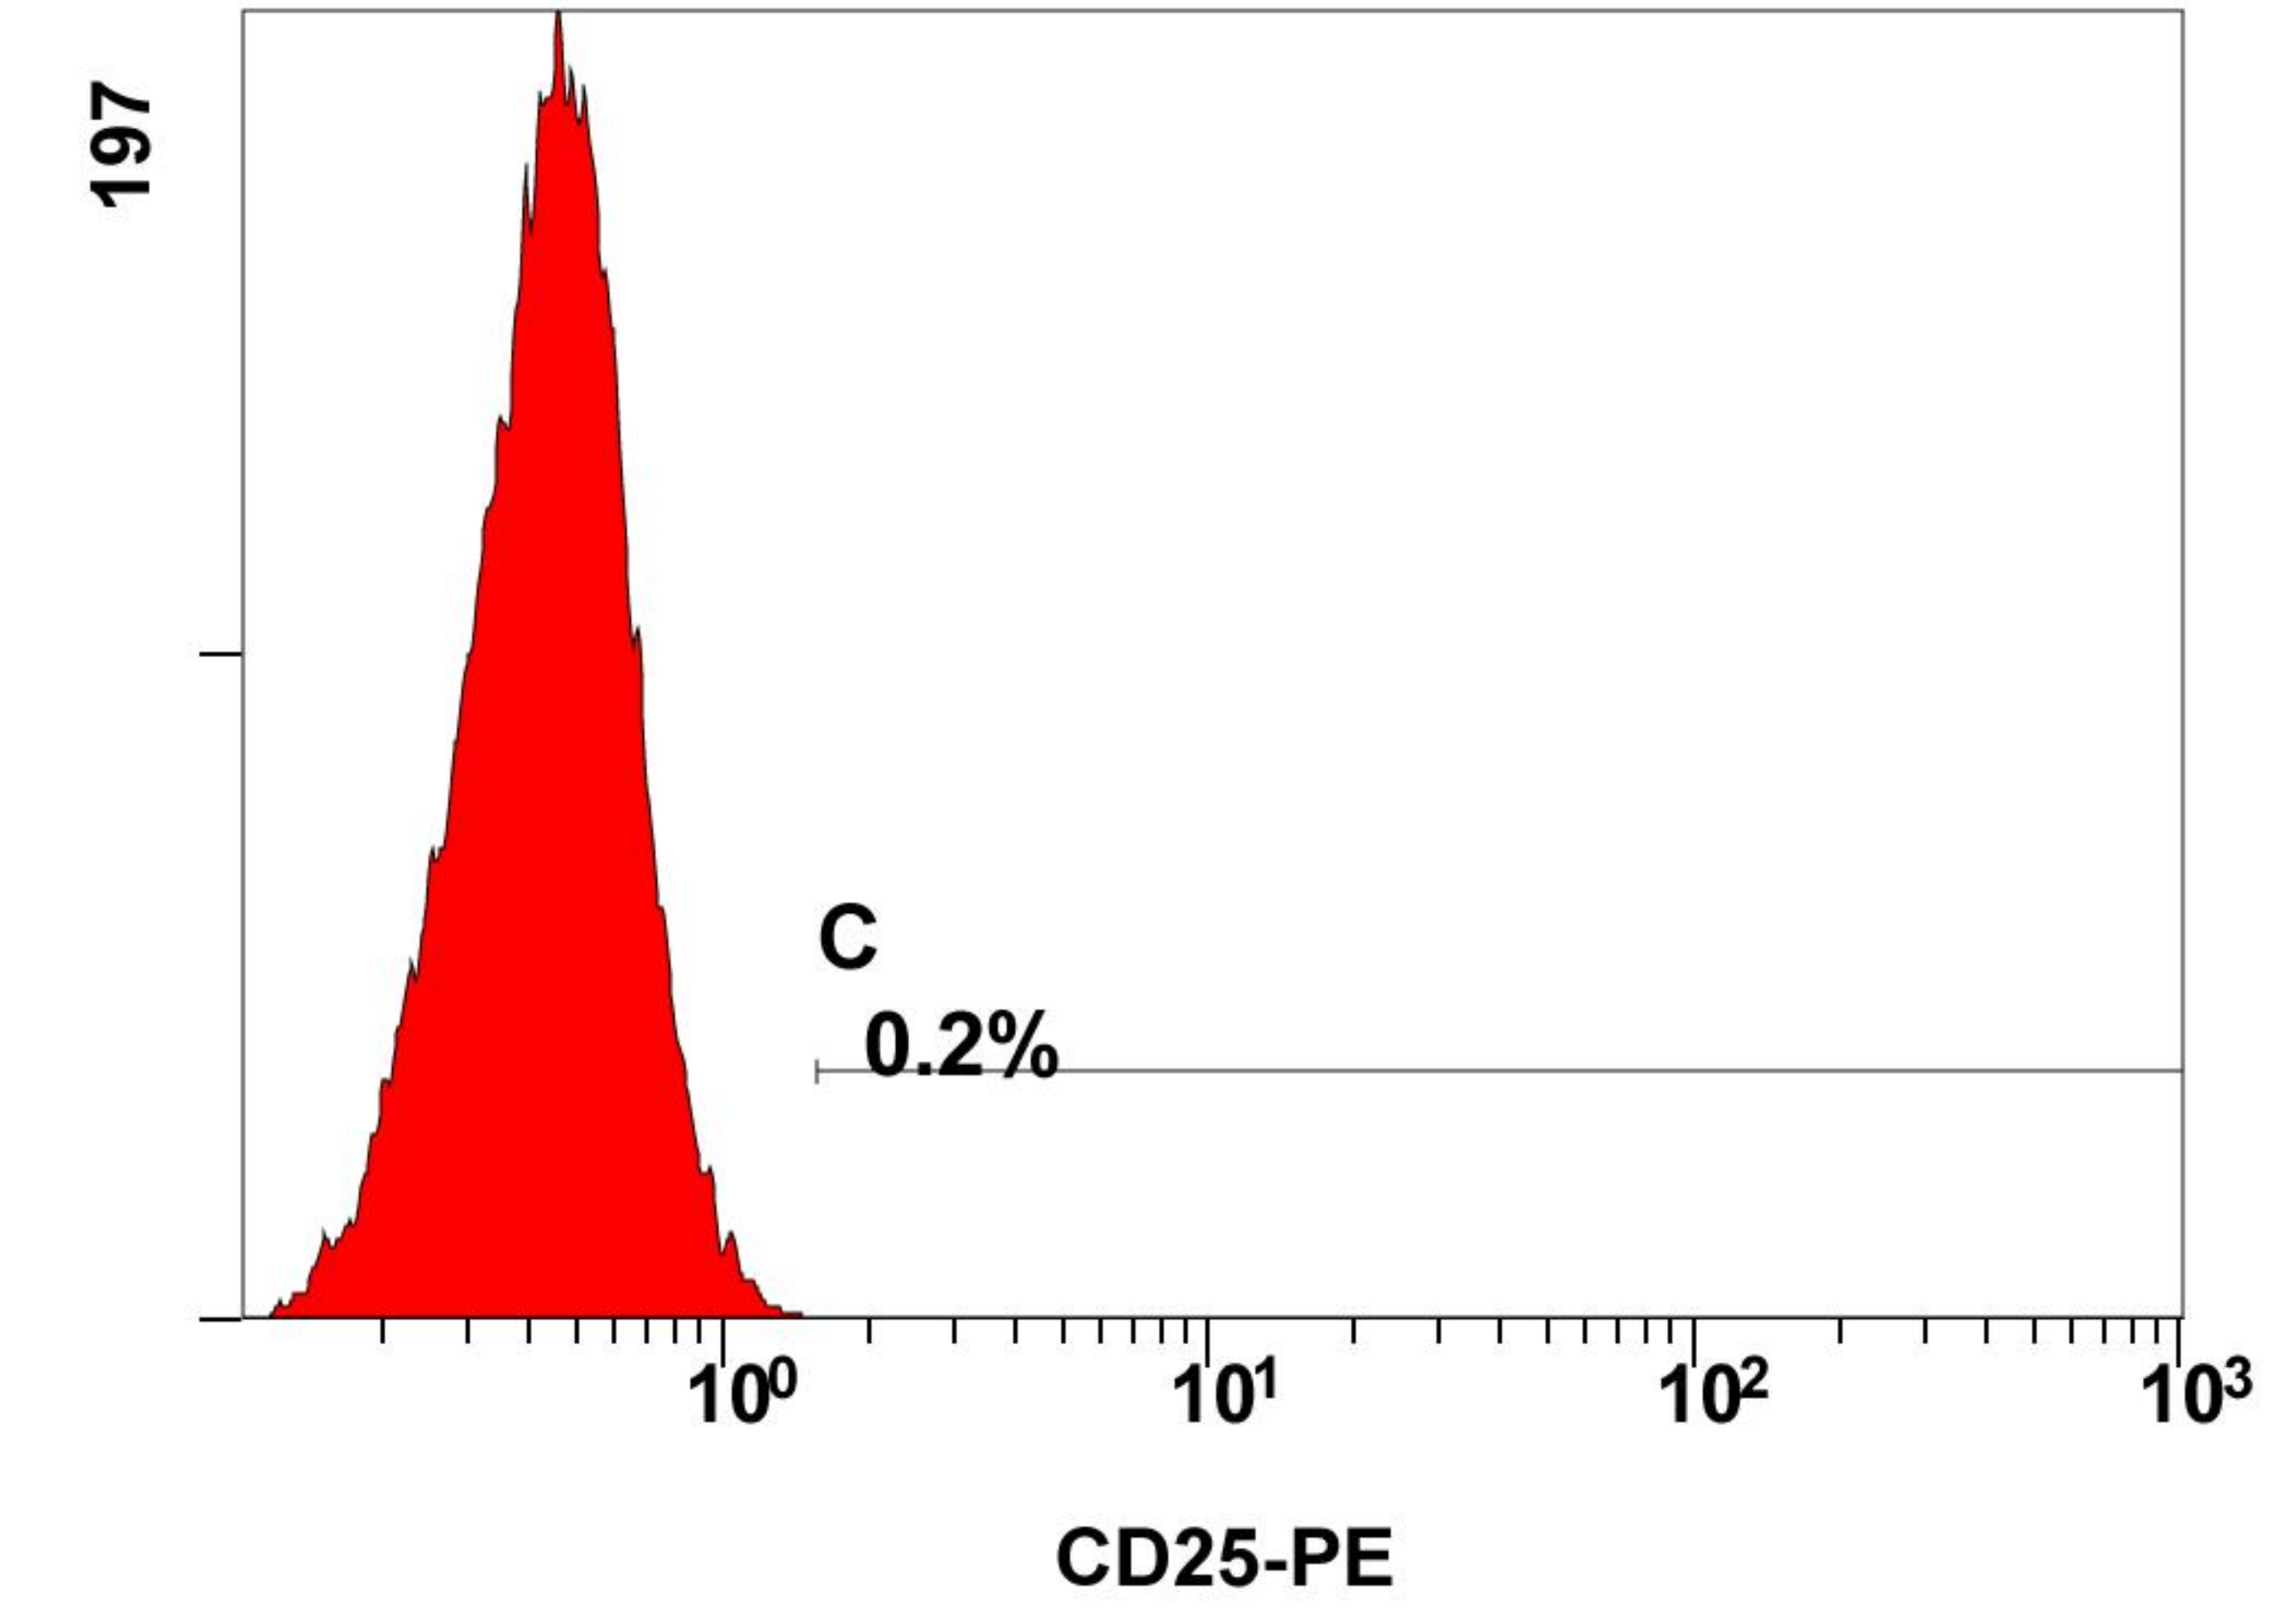

Supplement: f1 [file 785739.f1.pdf]
